## 1 Genetically Engineered DENV Produces Antigenically Distinct Mature Particles

2  
3 Longping V. Tse<sup>1,\*</sup>, Rita M. Meganck<sup>1</sup>, Stephanie Dong<sup>1</sup>, Lily E. Adams<sup>1,2</sup>, Laura J. White<sup>2</sup>, Aravinda M. de  
4 Silva<sup>2</sup>, Ralph S. Baric<sup>1,2,\*</sup>

5  
6 <sup>1</sup>Department of Epidemiology, <sup>2</sup>Department of Microbiology and Immunology,  
7 The University of North Carolina at Chapel Hill, NC United States

8 \* Co-corresponding authors: [lvkse@med.unc.edu](mailto:lvkse@med.unc.edu), [rbaric@email.unc.edu](mailto:rbaric@email.unc.edu)

### 9 **Abstract**

10 Maturation of Dengue viruses (DENV) alters the structure, immunity and infectivity of the virion  
11 and highly mature particles represent the dominant form *in vivo*. The production of highly mature virions  
12 principally relies on the structure and function of the viral premature protein (prM) and its cleavage by  
13 the host protease furin. We developed a reliable clonal cell line which produces single-round mature  
14 DENVs without the need for DENV reverse genetics. More importantly, using protein engineering coupled  
15 with natural and directed evolution of the prM cleavage site, we engineered genetically stable mature  
16 DENVs without comprising viral yield and independent of cell, host, or passage. Using these  
17 complementary strategies to regulate maturation, we demonstrate that the resulting mature DENVs are  
18 antigenically distinct from their isogenic immature forms. Given the clinical importance of mature DENVs  
19 in immunity, our strategy provides a reliable strategy for the production of stable, high-titer mature  
20 candidate DENV live virus vaccines, genetically stabilized viruses for DENV maturation and immunity  
21 studies, and models for maturation-regulated experimental evolution in mammalian and invertebrate  
22 cells. Our data from directed-evolution across host species reveals distinct maturation-dependent  
23 selective pressures between mammalian and insect cells, which sheds light on the divergent evolutionary  
24 relationship of DENVs between its host and vector.

25

## 26 **Introduction**

27 Mosquito-borne Dengue virus (DENV) is a major global public health threat causing ~400 million  
28 new cases of dengue annually<sup>1,2</sup>. Although the majority of cases occur in tropical and subtropical areas  
29 where the mosquito vectors are most concentrated, global warming, travel, and globalization have  
30 contributed to the worldwide spread and intermixing of the four DENV serotypes<sup>3</sup>. Indeed, DENV infection  
31 has increased 30-fold between 1960 and 2010 with an upsurge of cases in the USA and Europe. A hallmark  
32 of DENV pathogenesis is the possibility for antibody dependent enhancement (ADE), which can progress  
33 to life threatening dengue hemorrhagic fever/dengue shock syndrome (DHF/DSS) upon secondary  
34 infection with a different serotype. So far, no antiviral treatments are available to treat DENV disease and  
35 the only approved vaccine, Dengvaxia, is not recommended for use in naïve populations<sup>4,5</sup>.

36 Proteolytic cleavage of viral membrane fusion proteins is a common strategy for temporal or  
37 spatial control of virus infection, ultimately affecting tropism and transmission<sup>6,7</sup>. The DENV virion  
38 structural proteins consists of capsid, E (envelope), and prM glycoproteins which undergo major  
39 conformational changes via the process of maturation. The most common depiction of DENV particles  
40 features the mature form, which is composed of 90 Envelope (E) homodimers lying flat in a “herringbone”  
41 structure and organized into a 50 nm icosahedral (T=pseudo 3) symmetry resembling other non-  
42 enveloped virions<sup>8</sup>. However, the virion is assembled in the ER as a non-infectious<sup>9</sup>, immature virion which  
43 adopts a completely distinct structure as a 60 nm “spikey” sphere with 60 three-fold spikes<sup>10,11</sup>. Each  
44 “spike” is composed of three E protein monomers elevated at a 27° upward angle with the fusion loop  
45 covered by prM proteins<sup>11,12</sup>. Maturation is a two-step process involving the proteolytic cleavage of prM  
46 by furin, a ubiquitously expressed serine protease with a preference for basic (positively charged)  
47 substrates, at the trans-Golgi network (TGN) followed by its release at neutral pH outside of the cell<sup>11,13-</sup>  
48 <sup>15</sup>. Cleavage of prM releases pr from the virion and triggers the E protein to rotate, ranging from ~137° to  
49 ~300°, to form the mature virion<sup>10,16</sup>.

50 While the maturation status of common laboratory DENV strains varies, one study showed that  
51 clinical isolates are typically more mature, arguing the clinical importance of mature DENVs<sup>17</sup>. Because  
52 the E protein undergoes major conformational changes during processing, mature and immature virions  
53 are predicted to present dramatically different combinations of antigenic structures and epitopes<sup>18,19</sup>.  
54 Further complicating the process, the conformational change is reversible (“breathing”) and patchy, as a  
55 single particle can adopt both mature and immature forms in different regions and at different times<sup>20</sup>.  
56 The biological functions and characteristics of these heterogeneous maturation forms remain largely

57 unknown, but are thought to provide key evolutionary advantages in virus infection, immunity, and  
58 antigenic variation<sup>21,22</sup>.

59 Previous studies have shown that fully mature DENV can be generated in Vero cells  
60 overexpressing furin<sup>23</sup>. However, due to the polyclonal nature of the cells, viral yield as well as maturity  
61 depends on the cell passage and culture conditions. Furthermore, maturation phenotypes quickly switch  
62 from mature back to immature after a single replication, which limits assay usage to those not requiring  
63 viral replication. Importantly, maturation status can vary significantly between serotypes and genotypes,  
64 suggesting the presence of other, less understood, regulatory determinants<sup>24</sup>. In this study, we develop  
65 two complementary strategies, ectopic expression of furin in culture and virus genetic engineering, to  
66 produce mature virions across the four DENV serotypes. Additionally, we provide insight into the role of  
67 variation in the prM furin cleavage site as the major molecular determinant governing DENV maturation  
68 in vertebrate and invertebrate cells. Using protein engineering and directed-evolution, we generated high  
69 yields of mature DENV1, 2 and 4 using unmodified Vero cells. The current study advances our  
70 understanding of the biological and genetic processes of DENV maturation, develops novel tools and  
71 recombinant viruses, and provides further insight and essential tools for future investigations.

72

## 73 **Results**

### 74 **DENV Maturity is Serotype Dependent**

75 DENV maturation regulates virion infectivity and antigenicity and directly impacts antibody  
76 neutralization and potential vaccine efficacy. Since furin cleavage of the prM protein initiates the DENV  
77 maturation process, we hypothesized that furin cleavage efficiency is directly proportional to DENV  
78 maturation. Consequently, we compared the DENV1-4 prM cleavage site with other mosquito-borne  
79 Flaviviruses, highly pathogenic avian influenza virus (HPAI) and SARS-CoV-2. Sequence analyses suggested  
80 that all the DENV serotypes encoded a sub-optimal furin cleavage site (P4) R-X-K/R-R (P1) with negative  
81 modulators as indicated by an acidic residue at the P3 position (Fig. 1a). To analyze the functionality of  
82 the prM furin cleavage site in a more quantitative manner, we used the computational program PiTou,  
83 which combines machine learning and cumulative probability score function of known furin cleavages to  
84 calculate the logarithmic-odd probabilities of all the different viral furin cleavage sites<sup>25</sup>. These analyses  
85 provided strong predictive data that the DENV serotypes encode suboptimal furin sites (scores from 6.90  
86 – 13.26) compared with other Flaviviruses (scores from 13.30 – 15.40) (Fig. 1a). We focused our studies  
87 on four prototypical wildtype (WT) DENV viruses including WestPac (DV1-WT), S16803 (DV2-WT), 3001  
88 (DV3-WT) and Sri Lanka 92 (DV4-WT) isolates (Table 1). Using western blotting as a readout, we

89 determined the relative maturity of each serotype by calculating the ratio of prM to E. Consistent with  
 90 the hypothesis that prM cleavage is dependent on both local primary sequence and other distal and  
 91 structural functions, PiTou predictions do not translate completely to the empirical maturation status of  
 92 DENV. Relative maturity was clearly different between serotypes. In particular, serotypes encoding an  
 93 Glutamic acid (E), but not Aspartic acid (D) at the P3 position (prM residue 89) are associated with more  
 94 immature virion production in Vero cells, with DV2-WT virions containing the highest level of uncleaved  
 95 prM, followed by DV4-WT, DV3-WT, and DV1-WT which has nearly undetectable levels of prM, and hence  
 96 is more mature (Fig. 1b).

| Serotype | Strain           | Genotype |
|----------|------------------|----------|
| DV1      | WestPac 74 (WHO) | IV       |
| DV2      | S16803 (WHO)     | Asian I  |
| DV3      | 3001             | III      |
| DV4      | Sri Lanka 92     | IIb      |

**Table 1:** Prototypic WT DENV strains used in this study.

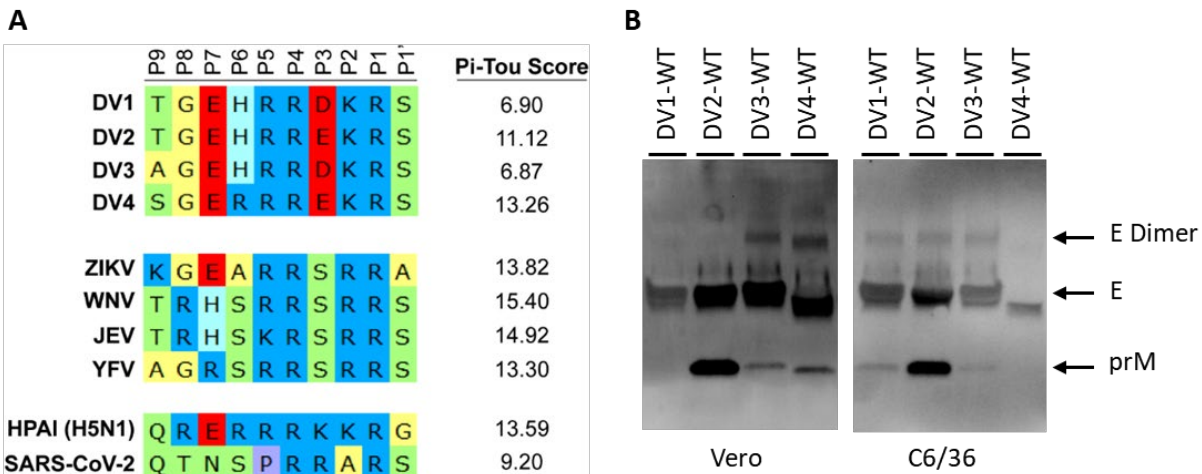

97  
 98 **Figure 1:** Furin cleavage site alignment and DENV maturation. (A) Amino acid sequence alignment of viral  
 99 furin cleavage sites from position 9 (P9) to position 1 prime (P1'). Pi-Tou scores are the prediction of  
 100 logarithmic-odd probabilities of all the different viral furin cleavage sites (higher value = better substrate  
 101 for furin). DENV1, 2, 3 4, Zika virus (ZIKV), West Nile virus (WNV), Japanese encephalitis virus (JEV), yellow  
 102 fever virus (YFV), highly pathogenic avian influenza virus (HPAI) and SARS-Coronavirus-2. (B)  
 103 Representative western blot images of DENV 1-4 viral supernatants from Vero and C6/36 cells blotted  
 104 with anti-Env and anti-prM antibodies.

105

## 106 **Optimized Clonal Vero-furin Cells Generate High Yield, Mature DENV**

107 DENV maturation also depends on the producer cells; for instance, C6/36 grown DENVs show a  
108 different maturation profile, from DV2-WT (most immature) < DV1-WT = DV3-WT < DENV4 (most mature)  
109 (Fig. 1b). As reported previously<sup>23</sup>, fully mature DENV strains can be generated in Vero cells that  
110 overexpress furin. However, high level furin expression may negatively impact DENV virus production.  
111 Using the sleeping beauty transposon system<sup>26</sup>, we isolated two clonal lines with high (VF-Hi) or low (VF-  
112 Lo) levels of furin expression (Fig. 2a). Immunofluorescent staining and western blot analysis revealed  
113 different levels of furin expression in the trans-Golgi network (Fig. 2b and 2c). The growth kinetics of all  
114 four DENV serotypes were tested on both Vero-furin lines and compared to unmodified Vero cells (Fig. 2d  
115 – g). DV1-WT, DV2-WT and DV4-WT showed similar growth kinetics in all cell lines tested, while VF-Hi  
116 supported better DV3-WT growth (Fig. 2d – g). VF-Hi supports the production of fully mature DENV virions  
117 across all four serotypes (Fig. 2d – g). In agreement with the low furin expression level, VF-Lo phenocopied  
118 the DENV maturation status of unmodified Vero cells (Fig. 2d – g). Therefore, VF-Hi cells allow for high  
119 DENV yield in all serotypes, suggesting the furin expression level in VF-Hi is optimal for production of fully  
120 mature DENVs.

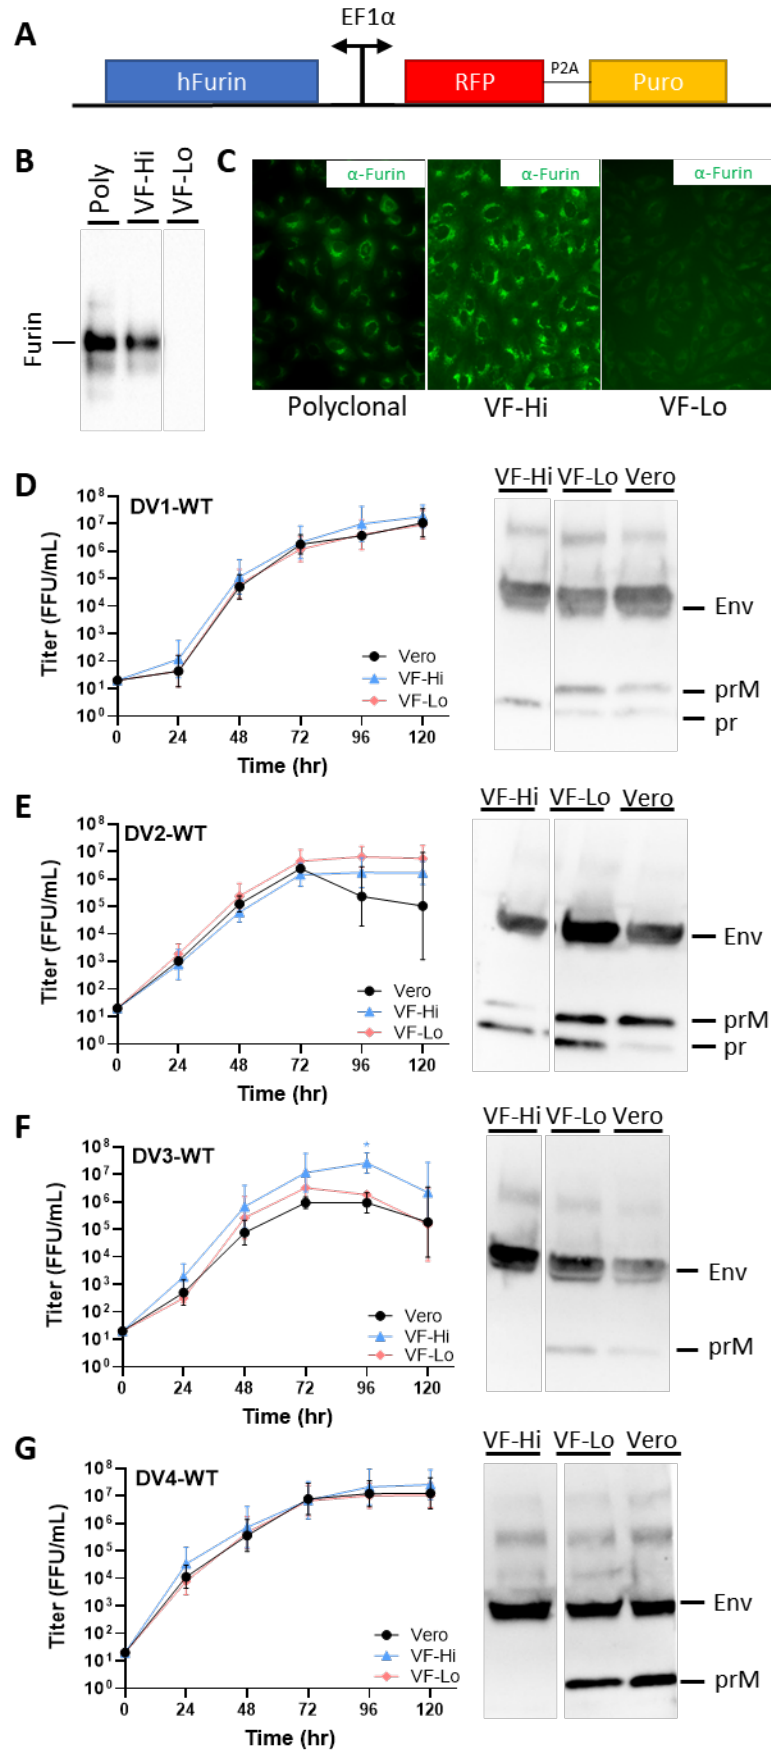

122 **Figure 2:** Growth kinetics and maturation status of Vero-furin grown DENVs. (A) Schematic of the Sleeping  
123 Beauty-based transposon cassette for ectopic expression of human furin (hFurin). A bi-directional EF1a  
124 promoter was used to drive the expression of hFurin and red-fluorescent protein (RFP) with a puromycin  
125 resistance gene (Puro) linked by a 2A self-cleaving peptide (P2A). (B) Western blot and (C)  
126 immunofluorescence images of polyclonal and clonal selected high (VF-Hi) and low (VF-Lo) expression  
127 hFurin Vero cells using anti-furin antibodies. Growth kinetics and degree of maturation of (D) DENV1-WT,  
128 (E) DENV2-WT, (F) DENV3-WT and (G) DENV4-WT in unmodified Vero cells (Black-Circle), VF-Hi cells (Blue-  
129 Triangle) and VF-Lo cells (Pink-Diamond). Cells were infected with DENV at MOI 0.01 – 0.05 for 120 hours.  
130 Supernatants were harvested at 120hpi and analyzed by western blot for DENV maturation using anti-Env  
131 and anti-prM antibodies. All assays were performed with at least two biological repeats with two technical  
132 replicates. Growth kinetics of DENV variants were compared to their corresponding wildtype using 2-way  
133 ANOVA multiple comparisons.

134

### 135 **Genetic Regulation of DENV1 and DENV4 Maturation Status**

136 As an alternative to ectopic overexpression of furin which only generates mature virion for a single  
137 round of infection, we hypothesized that genetic modification of the prM furin cleavage site could also be  
138 used to optimize DENV maturation independence of cells or hosts. Using DV1-WT as a model, we  
139 introduced a mutation at the P3 position of the furin cleavage site and generated an isogenic strain, DV1-  
140 prM-D89K. The mutated cleavage site (HRRKKR|S) has a Pi-Tou score of 14.68 compared to the DV1-WT  
141 cleavage site (HRRDKR|S) with a Pi-Tou score of 6.90, predicting more optimal cleavage (Fig. 3a). DV1-WT  
142 and DV1-prM-D89K displayed no difference in virus growth kinetics in Vero (mammalian) and C6/36  
143 (insect) cells (Fig. 3b). In both Vero and C6/36 cultures, DV1prM-D89K was more mature than DV1-WT,  
144 phenocopying the Vero-furin grown DV1-WT (Fig. 3c).

145 To understand if the furin cleavage site mutation is portable across serotypes, we introduced a  
146 similar mutation on the DV4-WT backbone, generating the isogenic strain DV4-prM-E89K (Fig. 3d). While  
147 we successfully generated a pure population of DV4-prM-E89K in C6/36 cells, a spontaneous mutation,  
148 K89N, rapidly emerged and gave rise to a new evolved DV4-prM-E89N variant in Vero cells by passage 2  
149 (Fig. S1a). By the 5<sup>th</sup> passage, the DV4-prM-E89N variant represented 100% of the viral population (Fig.  
150 S1a), supporting the notion that viruses encoding the E89K mutation were less fit than those encoding the  
151 E89K mutation in Vero cells. Growth kinetics of DV4-prM-E89K and DV4-prM-E89N on C6/36 cells are  
152 comparable to DV4-WT (Fig. 3e). However, the DV4-prM-E89K variant displayed a robust 2-log growth  
153 defect compared to DV4-prM-E89N and DV4-WT on Vero cells (Fig. 3f). When grown at 32°C, the growth

154 defect of DV4-prM-E89K was alleviated (Fig. S1c). The maturation status of the two variants were tested  
155 and compared to DV4-WT. DV4-prM-E89N is more mature than DV4-WT in both Vero and C6/36 cells (Fig.  
156 3g). No prM can be detected in DV4-prM-E89K; due to the low virus yield in Vero cells, the data suggest  
157 that either DV4-prM-E89K is fully mature or the protein input is below detection limit (Fig. S1b). As  
158 calculated by Pi-Tou, DV4 has the highest furin cleavage score among the DENV serotypes at 13.26. The  
159 point mutation prM-E89K increases the score to 16.65 (the highest score observed), while DV4-prM-E89N  
160 has a Pi-Tou score of 13.82 (Fig. 3d). In DENV4, it seems that a "super-optimal" furin cleavage site may  
161 negatively impact DENV growth in Vero cells. The data suggest a delicate balance likely exists between  
162 virion maturation, furin cleavage site efficiency, and viral fitness in different serotypes.



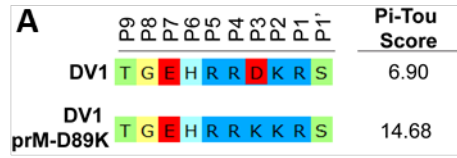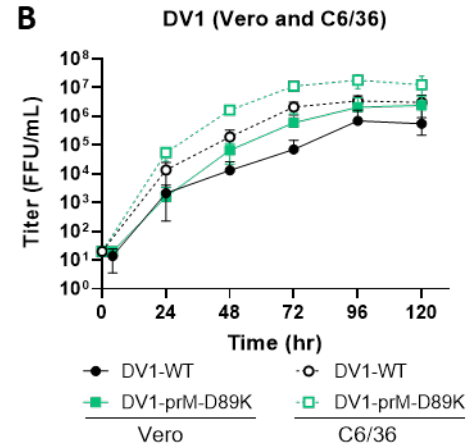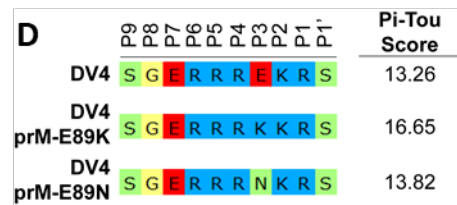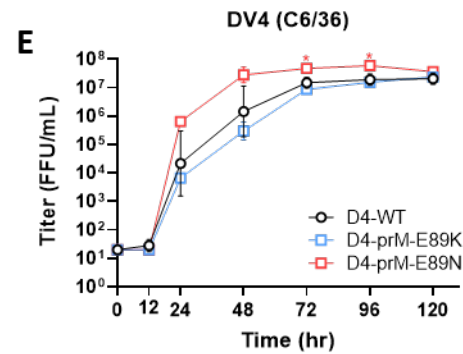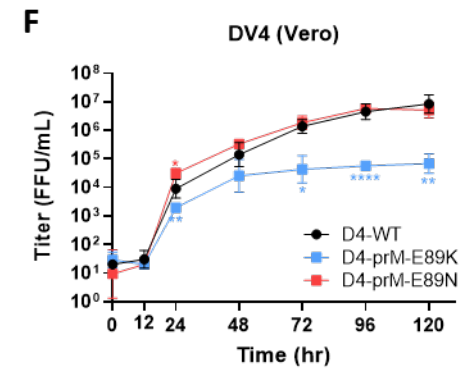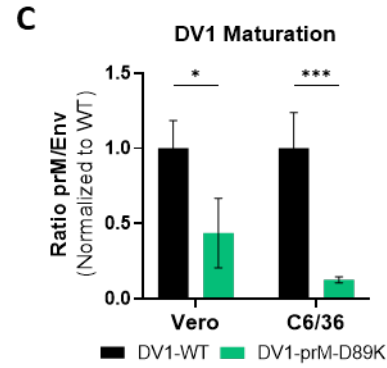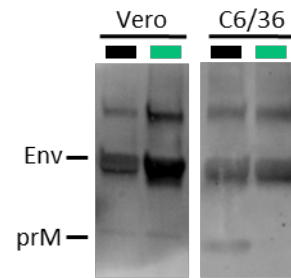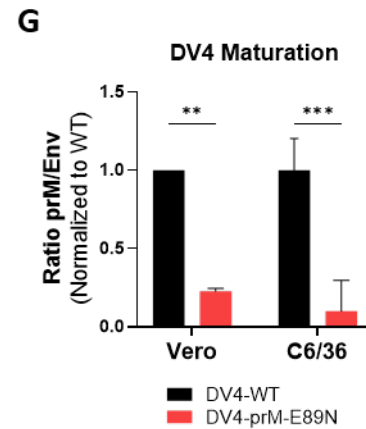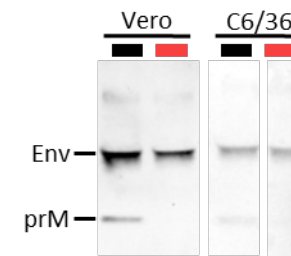

164 **Figure 3:** Generation of mature DENV1 and DENV4 via genetic modification. (A) Sequence alignment and  
 165 Pi-Tou scores of DV1-WT and DV1-prM-D89K. (B) Growth kinetics of DV1-WT and DV1-prM-D89K in Vero  
 166 and C6/36 cells. (C) Representative western blot image (bottom) of DV1-WT and DV1-prM-D89K viral  
 167 supernatants blotted with anti-Env and anti-prM antibodies, and quantification (top) of viral maturation  
 168 (prM/Env) normalized to DV1-WT (lower value = more mature). (D) Sequence alignment and Pi-Tou scores  
 169 of DV4-WT, DV4-prM-E89K and DV4-prM-E89N. Growth kinetics of DV4-WT, DV4-prM-E89K and DV4-  
 170 prM-E89N in (E) C6/36 and (F) Vero cells. (G) Representative western blot image (bottom) of DV4-WT,  
 171 DV4-prM-E89K and DV4-prM-E89N viral supernatants blotted with anti-Env and anti-prM antibodies and  
 172 quantification (top) of viral maturation (prM/Env) normalized to DV4-WT (lower value = more mature).  
 173 Growth kinetics and maturation of DENV variants were compared to their corresponding wildtype using  
 174 2-way ANOVA multiple comparisons.

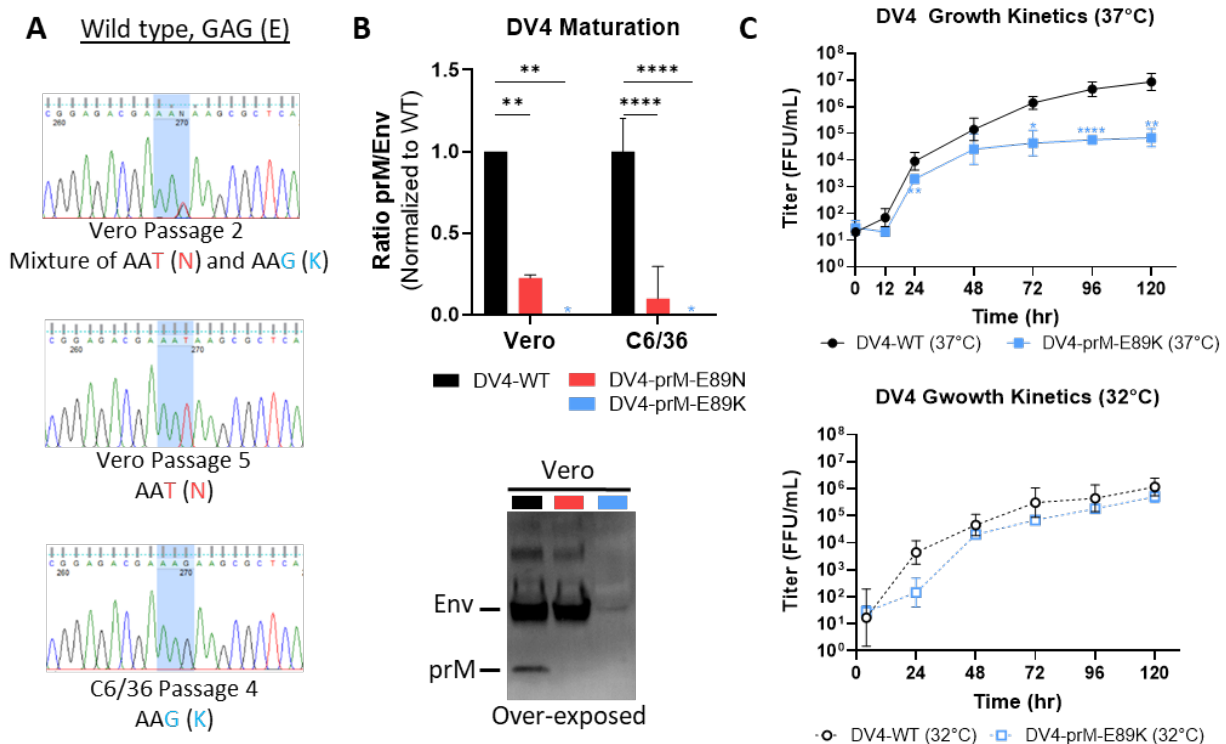

175 **Supplementary Figure 1:** (A) DNA Chromatograms of DV4-E89K in C6/36 cells (bottom) as well as Vero  
 176 cells from early (P2, top) and late (P5, middle) passage. (B) Representative western blot image (bottom)  
 177 of DV4-WT, DV4-prM-E89K and DV4-prM-E89N viral supernatant blotted with anti-Env and anti-prM  
 178 antibodies, and quantification of viral maturation (prM/Env) normalized to DV4-WT. (C) Growth kinetics  
 179 of DV4-WT and DV4-prM-E89K in Vero and C6/36 cells at 32°C (bottom) and 37°C (top).  
 180  
 181

## 182 **Directed Evolution Reveals High Levels of Plasticity in DENV2 prM Cleavage Site**

183           Based on the spontaneous K89N mutation in DV4, we hypothesized the prM cleavage site has  
184 high plasticity, suggesting the existence of a “Goldilocks Zone” for efficient *in vitro* growth. We utilized  
185 saturation mutagenesis and directed-evolution to simultaneously screen thousands of DENV2 prM  
186 cleavage site variants for efficient growth in tissue culture. We generated a DENV2 viral library in which  
187 four positions, P3, P5, P6, and P7, of the prM cleavage site were randomly mutated, preserving the core  
188 furin cleavage site (Fig. 4a). The library was propagated three times in either Vero or C6/36 cells, and each  
189 passage of the virus were deep sequenced along with the plasmid library (Fig. 4a). The theoretical amino  
190 acid diversity of the library is 160,000 variants (ignoring stop codons), which was represented in the  
191 plasmid library (Table 2). As expected, viral diversity rapidly drops after one passage, to 0.7% (1148 unique  
192 variants) and 16.2% (25942 unique variants) of the theoretical maximum in Vero and C6/36 respectively,  
193 further diminished after each passage (Table 2). The large number of viable DENV2 variants in both cells  
194 indicates a high degree of plasticity within the prM cleavage site in culture (Table 2). Importantly, C6/36  
195 cells were more tolerant to prM cleavage site variations than Vero, suggesting a higher selective pressure  
196 exerted by mammalian cells. After three rounds of selection in C6/36 and Vero cells, two different  
197 dominant variants, TGRAQRYKR|S (DV2-C1) and TGAGRRSKR|S (DV2-V1), emerged, representing almost  
198 50% of their respective viral populations (Fig 4b and 4c). While the DV2-WT cleavage site has a Pi-Tou  
199 score of 11.12, the Vero-selected cleavage site score increased to 14.39. Surprisingly, the DV2-C1 cleavage  
200 site scored at 7.76, a much lower score than DV2-WT (Fig. 4d). We plotted the Pi-Tou score distribution of  
201 the top 50 ranked variants in C6/36 and Vero cells, with peaks at 7.7 and 14.9, respectively (Fig. 4e). We  
202 also plotted the Pi-Tou scores of the top 50 sequences from passage 1 that were extinct by passage 3.  
203 Although there was no distinct peak of deselection in C6/36 cells, a distinct peak of Pi-Tou scores at 13.9  
204 were observed in the Vero-selected extinct population (Fig. 4e). The sequences, counts, and Pi-Tou scores  
205 of the top 50 enriched and deselected cleavage sites are summarized in Table S1 and S2. Due to founder  
206 effects in directed-evolution experiments, there is only one sequence shared between the top 50 variants  
207 evolved from Vero and C6/36 cells after three passages. Additionally, some variants with high Pi-Tou  
208 scores are rapidly deselected in both Vero and C6/36 cells, suggesting that the furin cleavage site  
209 sequence plays multiple roles in viral fitness (Table S2). The difference in scores between the two cell lines  
210 and the leveling effect of the lower ranked variants highlighted the differential fitness requirements of  
211 DENV2 between insect and mammalian cells.

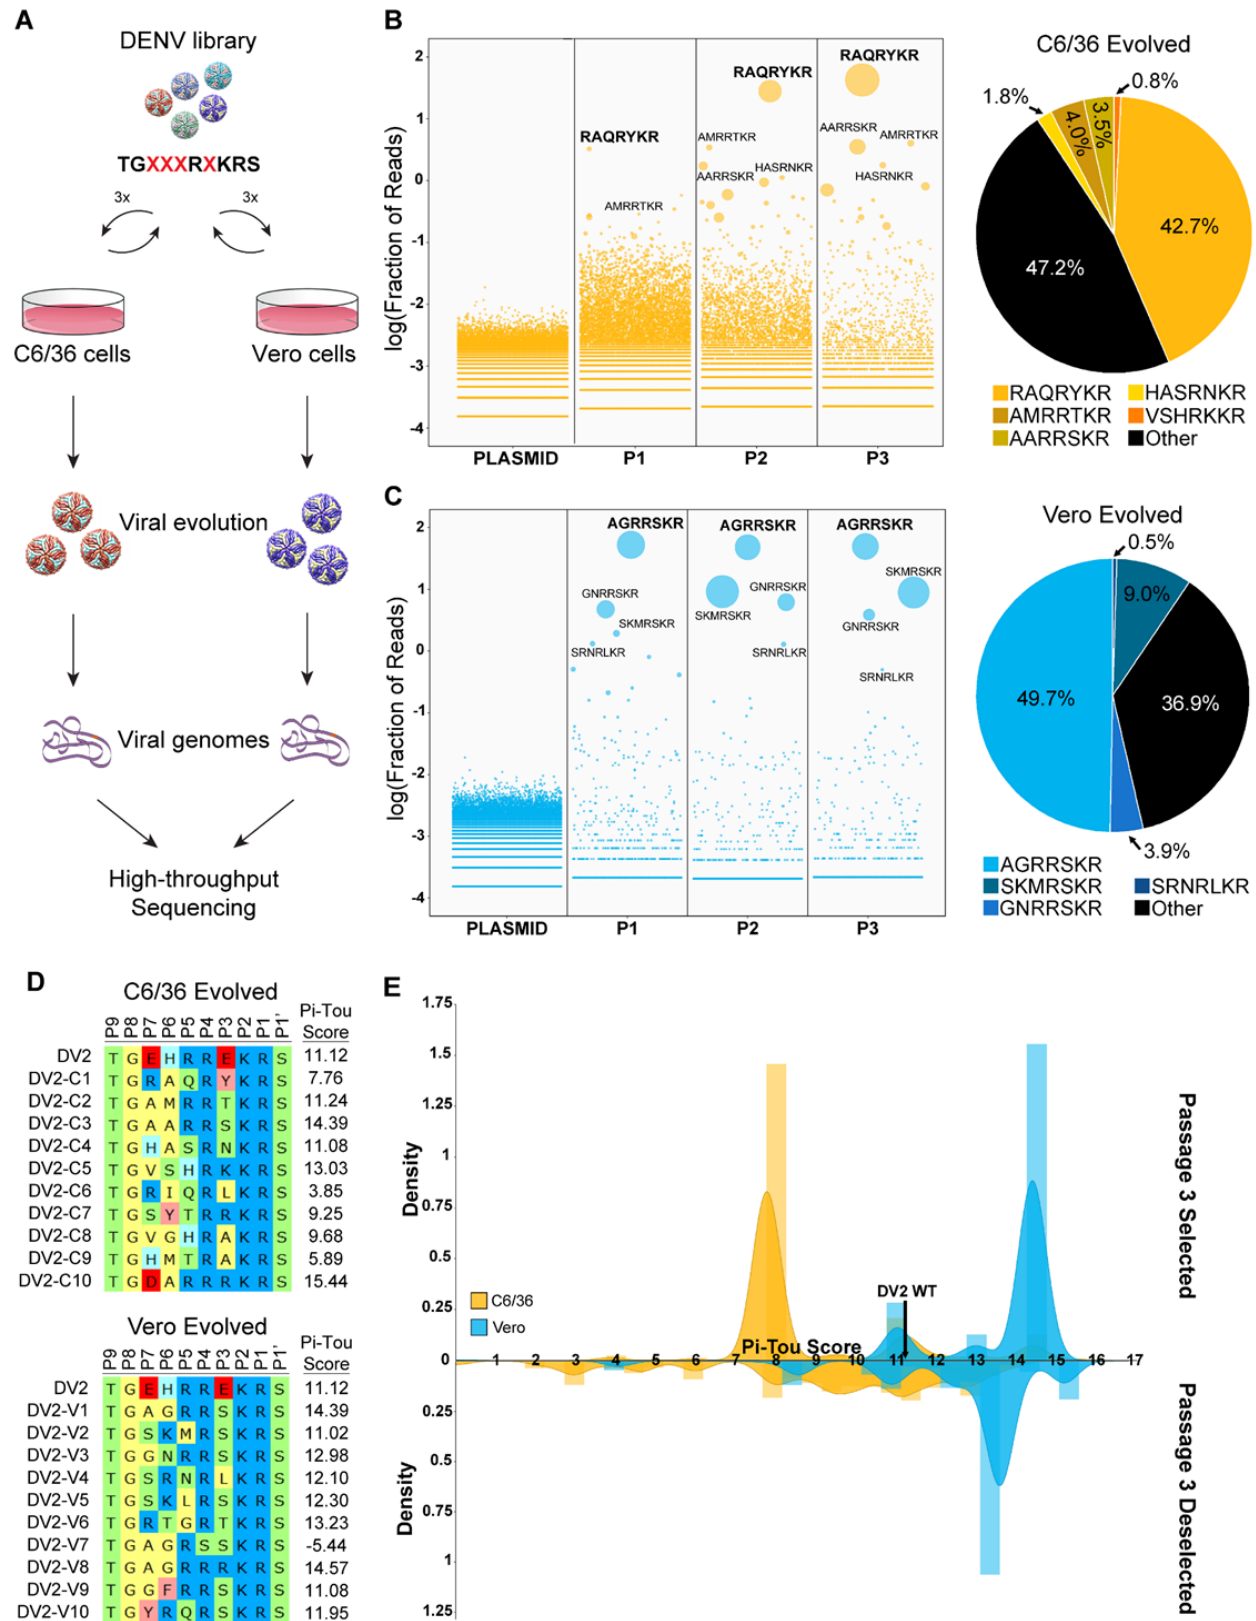

212

213 **Figure 4:** Directed-evolution of DENV2 prM cleavage site in Vero and C6/36 cells. (A) Schematic of

214 directed-evolution from library generation to high-throughput sequencing. Enrichment plot of prM

215 cleavage site sequences from plasmid library to viral population at the 3<sup>rd</sup> passage (P3) and the proportion  
216 as well as sequence of the Top 5 enriched sequences in (B) C6/36 (yellow) and (C) Vero cells (Cyan). (D)  
217 Sequences and Pi-Tou scores of the Top 10 enriched prM cleavage sites from C6/36 and Vero cells. (E)  
218 Top: Distribution plot of Pi-Tou scores from the top 50 enriched prM cleavage sites in the 3<sup>rd</sup> passage of  
219 C6/36 (yellow) and Vero cells (Cyan). PiTou score of DV2-WT is marked at 11.12 with a dark line. Bottom:  
220 Distribution plot of Pi-Tou scores of the top 50 variants present at the 1<sup>st</sup> passage but lost in the 3<sup>rd</sup> passage  
221 of C6/36 (yellow) and Vero cells (Cyan).

| Name      | Sequence   | Pi-Tou Score |  |  | Name      | Sequence   | Pi-Tou Score |
|-----------|------------|--------------|--|--|-----------|------------|--------------|
| DENV2-C1  | TGRAQRYKRS | 7.33832      |  |  | DENV2-V1  | TGAGRRSKRS | 14.843       |
| DENV2-C2  | TGAARRSKRS | 14.843       |  |  | DENV2-V2  | TGGNRRSKRS | 13.4061      |
| DENV2-C3  | TGAAVRSKRS | 12.3488      |  |  | DENV2-V3  | TGSKMRSKRS | 11.3468      |
| DENV2-C4  | TGAMRRTKRS | 11.6874      |  |  | DENV2-V4  | TGSRNRLKRS | 12.4246      |
| DENV2-C5  | TGRIQRLKRS | 3.4267       |  |  | DENV2-V5  | TGMAKRSKRS | 13.7489      |
| DENV2-C6  | TGNSGRHKRS | 11.4735      |  |  | DENV2-V6  | TGTAKRSKRS | 13.7489      |
| DENV2-C7  | TGFSTRNKRS | 10.0498      |  |  | DENV2-V7  | TGYRQRSKRS | 12.3466      |
| DENV2-C8  | TGAANRVKRS | 11.1661      |  |  | DENV2-V8  | TGLSRRSKRS | 15.3795      |
| DENV2-C9  | TGSVQRIKRS | 8.36797      |  |  | DENV2-V9  | TGGFRRSKRS | 11.508       |
| DENV2-C10 | TGVSRRSKRS | 15.3795      |  |  | DENV2-V10 | TGRQARSKRS | 11.0661      |
| DENV2-C11 | TGSTRDKRS  | 7.72902      |  |  | DENV2-V11 | TGKMRREKRS | 8.66191      |
| DENV2-C12 | TGTKGRVKRS | 12.3958      |  |  | DENV2-V12 | TGSNKRHKRS | 10.7461      |
| DENV2-C13 | TGTTHRHKRS | 11.0362      |  |  | DENV2-V13 | TGRTGRTKRS | 12.8044      |
| DENV2-C14 | TGLPVRSKRS | 12.6207      |  |  | DENV2-V14 | TGERARVKRS | 12.8337      |
| DENV2-C15 | TGSRTSKRS  | 13.0648      |  |  | DENV2-V15 | TGRYKRDKRS | 4.10841      |
| DENV2-C16 | TGSTRRHKRS | 13.4014      |  |  | DENV2-V16 | TGAGRSSKRS | -4.9918      |
| DENV2-C17 | TGHVSRKRS  | 12.2249      |  |  | DENV2-V17 | TGAWRRSKRS | -5.18386     |
| DENV2-C18 | TGTRNRKRS  | 13.8726      |  |  | DENV2-V18 | TGAGRRRKRS | 15.0224      |
| DENV2-C19 | TGFTNRVKRS | 11.247       |  |  | DENV2-V19 | TGGKSRVKRS | 13.5558      |
| DENV2-C20 | TGSNSRSKRS | 12.156       |  |  | DENV2-V20 | TGRPVRSKRS | 12.6207      |
| DENV2-C21 | TGASSRHKRS | 12.598       |  |  | DENV2-V21 | TGHSRREKRS | 12.5334      |
| DENV2-C22 | TGQVHRKRS  | 11.0663      |  |  | DENV2-V22 | TGWGKRSKRS | 13.7489      |
| DENV2-C23 | TGTAKRSKRS | 13.7489      |  |  | DENV2-V23 | TGTGRRMKRS | 12.5588      |
| DENV2-C24 | TGNLRRTKRS | 14.5679      |  |  | DENV2-V24 | TGAGRIKRS  | 13.5353      |
| DENV2-C25 | TGFSSRSKRS | 14.164       |  |  | DENV2-V25 | TGRSKRSKRS | 14.2854      |
| DENV2-C26 | TGGKVRNKRS | 10.82        |  |  | DENV2-V26 | TGSVRRVKRS | 12.5076      |
| DENV2-C27 | TGGHVRHKRS | 10.4826      |  |  | DENV2-V27 | TGASHRSKRS | 13.016       |
| DENV2-C28 | TGSAQRKRS  | 11.1173      |  |  | DENV2-V28 | TGMSKRTKRS | 14.4649      |
| DENV2-C29 | TGEKKRAKRS | 11.8098      |  |  | DENV2-V29 | TGAGRRNKRS | 12.5588      |
| DENV2-C30 | TGITTRSKRS | 11.6576      |  |  | DENV2-V30 | TGPGRSKRS  | 14.843       |
| DENV2-C31 | TGAHKREKRS | 10.4483      |  |  | DENV2-V31 | TGFKHRVKRS | 12.2057      |
| DENV2-C32 | TGGARRQKRS | 14.399       |  |  | DENV2-V32 | TGGRHRNKRS | 11.2579      |
| DENV2-C33 | TGLTRRSKRS | 14.9674      |  |  | DENV2-V33 | TGAGRSKRS  | 13.6629      |
| DENV2-C34 | TGASRAKRS  | 13.0953      |  |  | DENV2-V34 | TGAGLRSKRS | 11.8703      |
| DENV2-C35 | TGHMTRAKRS | 6.18586      |  |  | DENV2-V35 | TGAARRSKRS | 14.843       |
| DENV2-C36 | TGLKVRHKRS | 11.5383      |  |  | DENV2-V36 | TGAGRRTKRS | 15.0224      |
| DENV2-C37 | TGGAKRGKRS | 10.9028      |  |  | DENV2-V37 | TGAERRSKRS | 11.508       |
| DENV2-C38 | TGHASRNKRS | 11.3823      |  |  | DENV2-V38 | TGSKLRSKRS | 12.6269      |
| DENV2-C39 | TGGDARRKRS | 9.84567      |  |  | DENV2-V39 | TGAVRRSKRS | 13.4061      |
| DENV2-C40 | TGVASRTKRS | 13.846       |  |  | DENV2-V40 | TGTGRRSKRS | 14.843       |
| DENV2-C41 | TGNYPRNKRS | 7.18517      |  |  | DENV2-V41 | TGARRRSKRS | 15.626       |
| DENV2-C42 | TGERTRSKRS | 13.0648      |  |  | DENV2-V42 | TGATKRSKRS | 13.8734      |
| DENV2-C43 | TGRRMRKRS  | 11.7847      |  |  | DENV2-V43 | TGDGRRSKRS | 14.843       |
| DENV2-C44 | TGERKRAKRS | 12.2477      |  |  | DENV2-V44 | TGSKIRTKRS | 13.2837      |
| DENV2-C45 | TGMNKRSKRS | 12.312       |  |  | DENV2-V45 | TGAGCRSKRS | -5.14866     |
| DENV2-C46 | TGHPSRGKRS | 11.0941      |  |  | DENV2-V46 | TGSRRSKRS  | 14.843       |
| DENV2-C47 | TGVRARTKRS | 13.9117      |  |  | DENV2-V47 | TGGTRRSKRS | 14.9674      |
| DENV2-C48 | TGRSLRSKRS | 12.3732      |  |  | DENV2-V48 | TGVRRSKRS  | 14.843       |
| DENV2-C49 | TGMPRRSKRS | 15.082       |  |  | DENV2-V49 | TGISKRGKRS | 11.1775      |
| DENV2-C50 | TGRAVRHKRS | 10.7828      |  |  | DENV2-V50 | TGSRNRFKRS | 11.0389      |

222

223 **Supplemental Table 1:** Top 50 enriched sequences and PiTou scores of DV2 directed-evolution.

| Name      | Sequence    | Pi-Tou Score |  |  | Name      | Sequence   | Pi-Tou Score |
|-----------|-------------|--------------|--|--|-----------|------------|--------------|
| DENV-DC1  | TGQNSRLKRS  | 11.2574      |  |  | DENV-DV1  | TGMAKRSKRS | 13.7489      |
| DENV-DC2  | TGQMSRNKRS  | 8.01577      |  |  | DENV-DV2  | TGTAKRSKRS | 13.7489      |
| DENV-DC3  | TGSNYRSKRS  | 4.65351      |  |  | DENV-DV3  | TGLSRRSKRS | 15.3795      |
| DENV-DC4  | TGLFTRNKRS  | 6.15277      |  |  | DENV-DV4  | TGRQARSKRS | 11.0661      |
| DENV-DC5  | TGRLRRAKRS  | 12.1042      |  |  | DENV-DV5  | TGKMRREKRS | 8.66191      |
| DENV-DC6  | TGTPKRLKRS  | 13.0894      |  |  | DENV-DV6  | TGSNKRHKRS | 10.7461      |
| DENV-DC7  | TGKINRAKRS  | 2.98847      |  |  | DENV-DV7  | TGERARVKRS | 12.8337      |
| DENV-DC8  | TGSFTRSKRS  | 8.43697      |  |  | DENV-DV8  | TGRYKRDKRS | 4.10841      |
| DENV-DC9  | TGGSPRAKRS  | 10.126       |  |  | DENV-DV9  | TGGKSRVKRS | 13.5558      |
| DENV-DC10 | TGSKLRIKRS  | 11.3193      |  |  | DENV-DV10 | TGRPVRSKRS | 12.6207      |
| DENV-DC11 | TGTGTRLKRS  | 10.9346      |  |  | DENV-DV11 | TGHSRREKRS | 12.5334      |
| DENV-DC12 | TGHMNLKRS   | 7.79803      |  |  | DENV-DV12 | TGWGKRSKRS | 13.7489      |
| DENV-DC13 | TGFSTRQKRS  | 11.8901      |  |  | DENV-DV13 | TGTGRRMKRS | 12.5588      |
| DENV-DC14 | TGGTTRAKRS  | 9.63526      |  |  | DENV-DV14 | TGRSKRSKRS | 14.2854      |
| DENV-DC15 | TGESMRKRS   | 11.0639      |  |  | DENV-DV15 | TGSVRRVKRS | 12.5076      |
| DENV-DC16 | TGYRSRPKRS  | 13.0114      |  |  | DENV-DV16 | TGASHRSKRS | 13.016       |
| DENV-DC17 | TGSNSRAKRS  | 9.87178      |  |  | DENV-DV17 | TGMSKRTKRS | 14.4649      |
| DENV-DC18 | TGRSIRSKRS  | 12.8553      |  |  | DENV-DV18 | TGFKHRVKRS | 12.2057      |
| DENV-DC19 | TGHDSRHKRS  | 9.20017      |  |  | DENV-DV19 | TGGRHRNKRS | 11.2579      |
| DENV-DC20 | TGFVGRHKRS  | 9.53267      |  |  | DENV-DV20 | TGATKRSKRS | 13.8734      |
| DENV-DC21 | TGGAHRLKRS  | 11.6078      |  |  | DENV-DV21 | TGISKRGKRS | 11.1775      |
| DENV-DC22 | TGSNPRMKRS  | 8.12156      |  |  | DENV-DV22 | TGNHRRNKRS | 12.1042      |
| DENV-DC23 | TGSNTRIKRS  | 9.01827      |  |  | DENV-DV23 | TGSLRRIKRS | 13.0807      |
| DENV-DC24 | TGVARTKRS   | 12.808       |  |  | DENV-DV24 | TGQYKRSKRS | 11.3468      |
| DENV-DC25 | TGTRVRSKRS  | 13.5421      |  |  | DENV-DV25 | TGRPRDKRS  | 7.84358      |
| DENV-DC26 | TGHVGRDKRS  | 3.86024      |  |  | DENV-DV26 | TGYSKRPKRS | 12.4046      |
| DENV-DC27 | TGSIMRHKRS  | 2.208        |  |  | DENV-DV27 | TGMAQRSKRS | 11.1173      |
| DENV-DC28 | TGPKSRLKRS  | 13.5558      |  |  | DENV-DV28 | TGTSRRNKRS | 13.0953      |
| DENV-DC29 | TGNVRRYKRS  | 9.62714      |  |  | DENV-DV29 | TGQKARSKRS | 13.2943      |
| DENV-DC30 | TGYSRRDKRS  | 8.14108      |  |  | DENV-DV30 | TGIAKRSKRS | 13.4871      |
| DENV-DC31 | TGYGHRYKRS  | 8.72497      |  |  | DENV-DV31 | TGGRTRQKRS | 12.6208      |
| DENV-DC32 | TGAANRLKRS  | 11.1661      |  |  | DENV-DV32 | TGRKVRSKRS | 13.1042      |
| DENV-DC33 | TGVHNRNKRS  | 9.49747      |  |  | DENV-DV33 | TGSMKRSKRS | 10.4139      |
| DENV-DC34 | TGVARTLKRS  | 11.73        |  |  | DENV-DV34 | TGTAQRSKRS | 11.1173      |
| DENV-DC35 | TGHNTRDKRS  | 3.08753      |  |  | DENV-DV35 | TGNTHRTKRS | 12.7816      |
| DENV-DC36 | TGASHRPKRS  | 11.1351      |  |  | DENV-DV36 | TGGFRYKRS  | 7.72902      |
| DENV-DC37 | TGGTRRVKRS  | 14.0689      |  |  | DENV-DV37 | TGNKSRNKRS | 12.1701      |
| DENV-DC38 | TGVPMRQKRS  | 10.3953      |  |  | DENV-DV38 | TGKTRDKRS  | 7.72902      |
| DENV-DC39 | TGSGNRAKRS  | 9.77666      |  |  | DENV-DV39 | TGMTRRGKRS | 12.1213      |
| DENV-DC40 | TGKIGREKRS  | 2.90178      |  |  | DENV-DV40 | TGRHRRDKRS | 7.15001      |
| DENV-DC41 | TGHHNRTKRS  | 11.9611      |  |  | DENV-DV41 | TGTSRRHKRS | 13.8135      |
| DENV-DC42 | TGWTARSKRS  | 12.6286      |  |  | DENV-DV42 | TGQNRDKRS  | 6.16771      |
| DENV-DC43 | TGSKIRDKRS  | 5.86584      |  |  | DENV-DV43 | TGMAKRTKRS | 13.9284      |
| DENV-DC44 | TGLHGRPKRS  | 10.3586      |  |  | DENV-DV44 | TGTAKRLKRS | 12.8504      |
| DENV-DC45 | TGTAGR NKRS | 10.2558      |  |  | DENV-DV45 | TGSLSRHKRS | 11.6436      |
| DENV-DC46 | TGDQRLLKRS  | 12.5076      |  |  | DENV-DV46 | TGLSKRSKRS | 14.2854      |
| DENV-DC47 | TGRTHRFKRS  | 10.318       |  |  | DENV-DV47 | TGASRRDKRS | 8.14108      |
| DENV-DC48 | TGGFGRSKRS  | 9.14369      |  |  | DENV-DV48 | TGSKNRAKRS | 10.601       |
| DENV-DC49 | TGHSYRPKRS  | 4.78077      |  |  | DENV-DV49 | TGSRVRDKRS | 6.30372      |
| DENV-DC50 | TGERWRHKRS  | -5.40603     |  |  | DENV-DV50 | TGDTRRSKRS | 14.9674      |

224

225 **Supplemental Table 2: Top 50 deselected sequences and PiTou scores of DV2 directed-evolution**

226 The top ranked evolved variants, DV2-V1 and DV2-C1, were re-derived via reverse genetics for  
 227 further characterization. We also included a DV2-prM-E89K variant similar to the original DV1 mutation  
 228 as comparison (Fig. 5c). While the DV2-prM-E89K variant has slightly reduced growth in Vero cells  
 229 compared to DV2-WT, both DV2-V1 and DV2-C1 grow better than DV2-WT in Vero, with a drop in titer in  
 230 C6/36 cells at 96 to 120 hpi (Fig. 5a and 5b). In Vero cells, DV2-prM-E89K and DV2-V1 are almost fully  
 231 mature while DV2-C1 is only 30% more mature than DV2 WT (Fig. 5d). When the viruses are grown in  
 232 C6/36, all the variants are 60 – 70% more mature than DV2 WT (Fig. 5d).

|         | C6/36 Evolved    |           | Vero Evolved     |           |
|---------|------------------|-----------|------------------|-----------|
|         | Unique Sequences | % Maximum | Unique Sequences | % Maximum |
| Plasmid | 164569           | 102.86*   | 164569           | 102.86*   |
| P1      | 25942            | 16.21     | 1148             | 0.72      |
| P2      | 14119            | 8.82      | 719              | 0.45      |
| P3      | 6026             | 3.77      | 683              | 0.43      |

\* Plasmid library contains some sequences with stop codons.

**Table 2:** Summary of plasmid and viral passages diversities of DV2 directed-evolution.

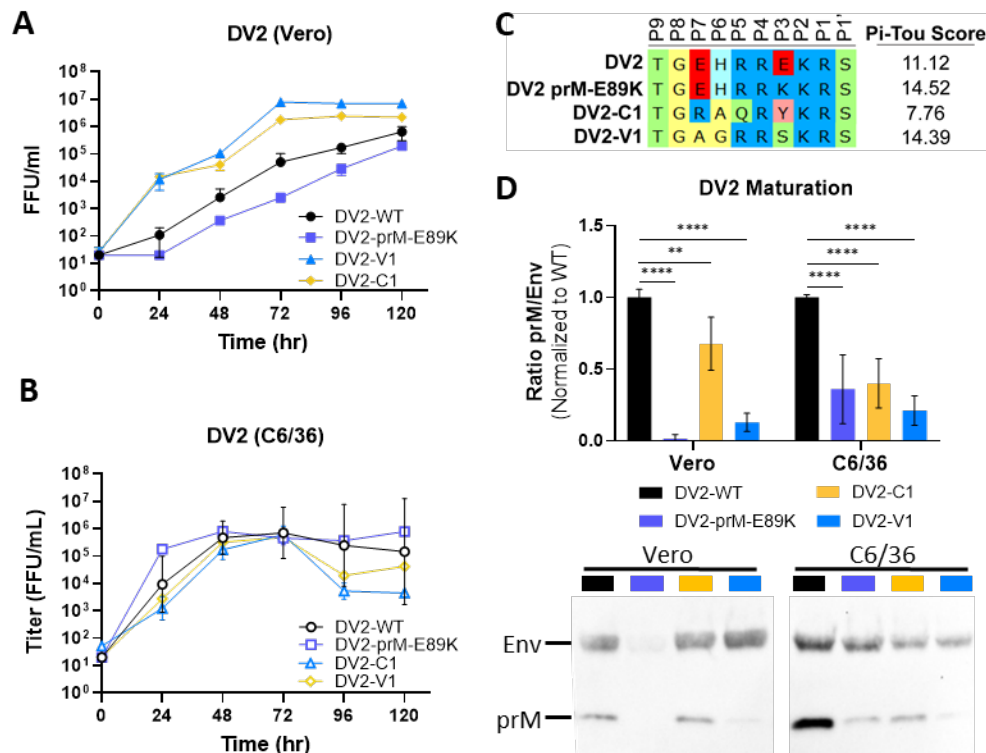

233  
 234 **Figure 5:** Generation of mature DENV2 via directed-evolution. Growth kinetics of DV2-WT, DV2-prM-E89K,  
 235 DV2-C1 and DV2-V1 in (A) Vero and (B) C6/36 cells. (C) Sequence alignment and PiTou scores of DV2-WT,  
 236 DV2-prM-E89K, DV2-C1 and DV2-V1 (D) Representative western blot image (bottom) of DV2-WT, DV2-



237 prM-E89K, DV2-C1, and DV2-V1 viral supernatants blotted with anti-Env and anti-prM antibodies, and  
 238 quantification (top) of viral maturation (prM/Env) normalized to DV2-WT (lower value = more mature).  
 239 Growth kinetics and maturation of DV2 variants were compared to DV2-WT using 2-way ANOVA multiple  
 240 comparisons.

241

## 242 Impact of Maturation Status on DENV Epitope Presentation and Antigenicity

243 Given the ability to generate fully mature DENVs, we next evaluated the impact of maturation  
 244 status on antigenicity. We selected several monoclonal antibodies targeting different regions of the DENV  
 245 E glycoprotein, including C10 (Envelope-Dimer-Epitope 1)<sup>27</sup>, B7 (Envelope-Dimer-Epitope 2)<sup>27</sup>, 1C19 (BC  
 246 loop)<sup>28</sup> and 1M7 (fusion loop)<sup>28</sup>. As expected, Ab epitopes that are not maturation dependent are  
 247 preserved, as evidenced by antibodies such as C10, B7, and 1C19 which showed no difference in F  
 248 oci Reduction Neutralization Titer 50 values (FRNT<sub>50</sub>) (Fig. 6a – c). However, the fusion loop targeting  
 249 antibody 1M7 showed significantly different FRNT<sub>50</sub> values between fully mature and less mature DENVs  
 250 in DENV1 and 4, but not in DENV2 (Fig. 6a – c). For DENV4, we also tested polyclonal sera from patients  
 251 180 days post DENV4 vaccination or naturally infected patients from a traveler cohort. Polyclonal serum  
 252 contains a mixture of antibodies which may or may not be affected by virion maturation status.  
 253 Unsurprisingly, FRNT<sub>50</sub> of polyclonal serum was equivalent for fully mature and partially mature DENV4  
 254 (Fig. 6d).

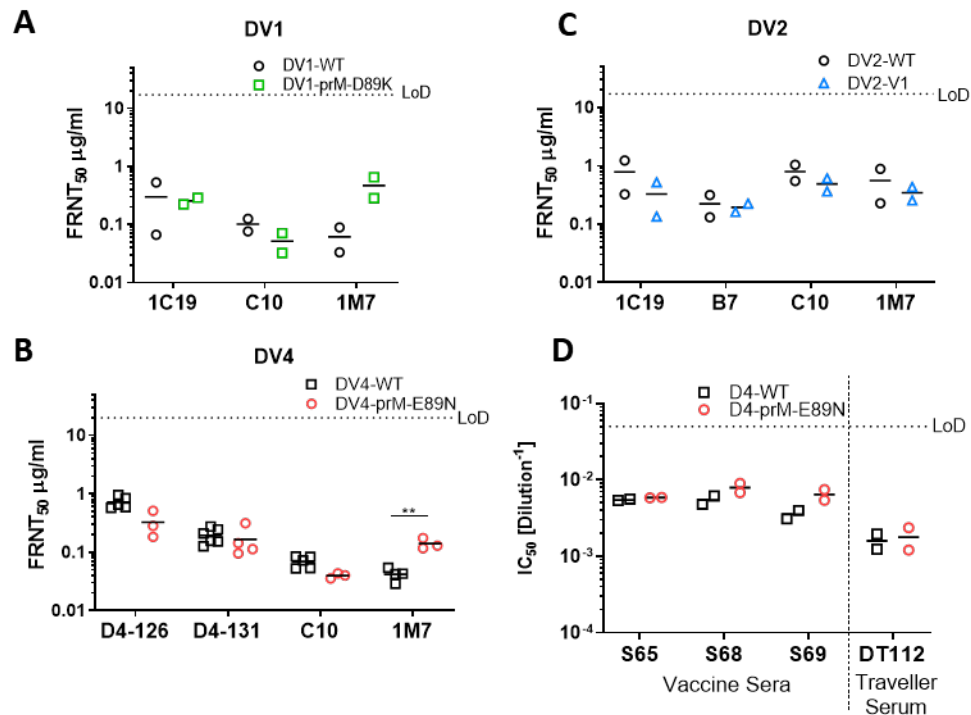

255

256 **Figure 6:** Antigenic profile of mature DENV. (A) FRNT<sub>50</sub> of DV1-WT and DV1-prM-D89K against 1C19, EDE1-  
 257 C10 (C10) and 1M7. (B) FRNT<sub>50</sub> of DV4-WT and DV4-prM-E89N against D4-126, D4-131, C10 and 1M7. (C)  
 258 FRNT<sub>50</sub> of DV2-WT and DV2-V1 against 1C19, EDE2-B7 (B7), C10 and 1M7. (D) FRNT<sub>50</sub> of vaccine sera and  
 259 traveler serum against DV4 and DV4-prM-E89N.

260

## 261 **Discussion**

262 In this report, we provided two methods to produce fully mature DENVs, and demonstrated that  
 263 the prM furin cleavage site is the main determinant of maturation. The minimal furin cleavage site only  
 264 requires (P4) R-X-K/R-R (P1), but cleavage efficiency greatly depends on positions P7, P6, P5, P3 and P1' –  
 265 P4'<sup>29–31</sup>. Algorithms such as Pi-Tou (used here) and ProP utilize machine learning to predict furin cleavage  
 266 site efficiency while Pi-Tou also account for cumulative probability score function of known furin  
 267 cleavage<sup>25,32</sup>. It must be noted that both programs focus on mammalian furin rather than invertebrate  
 268 furin proteases; human furin and *Aedes aegypti* furin-like-proteases only share ~40% sequence identity  
 269 (Fig. S2) and *Drosophila* furin has been shown to have different substrate preferences<sup>33</sup>. Perhaps  
 270 unsurprisingly, Pi-Tou predictions do not correlate fully with DENV maturation, as other determinants  
 271 such as cleavage site accessibility, protein structure, stability, and the stem region of prM can also affect  
 272 maturation in DENV and other viruses<sup>34–36</sup>. In DENV4, the degree of maturation differs among genotypes  
 273 with identical prM proteins, suggesting contributions by an envelope-dependent maturation determinant  
 274 as well<sup>24</sup>. A previous study generated mature dengue virus-like-particles (VLPs) by modifying the prM  
 275 cleavage site for optimal cleavage<sup>37</sup>. In the current work, modification of the furin cleavage site and  
 276 removal of the acidic P3 residues generated fully mature live DENV1, 2, and 4. However, unlike with  
 277 Dengue-VLPs, experiments with authentic virus exposed the fitness cost of these mutations. The large  
 278 growth defect of the DV4-prM-E89K variant was alleviated by reducing the temperature from 37°C to 32°C  
 279 during virus production, indicating that the mutation impacts stability<sup>18</sup>, while the spontaneous mutation  
 280 K89N restored viral fitness. These results hint at the presence of a maturity-stability balance in DENV, and  
 281 the unfavorable acidic residues at P3 may play a regulatory role.

282

| % Identity (amino acid)       | Human-Furin | Aedes-Furin-like protease 1 | Aedes-Vitellogenin Convertase | Aedes-Furin-like protease 2 | Aedes-AAEL010725-PA |
|-------------------------------|-------------|-----------------------------|-------------------------------|-----------------------------|---------------------|
| Human-Furin                   |             | 39                          | 39                            | 39                          | 33                  |
| Aedes-Furin-like protease 1   | 39          |                             | 99                            | 42                          | 34                  |
| Aedes-Vitellogenin Convertase | 39          | 99                          |                               | 42                          | 34                  |
| Aedes-Furin-like protease 2   | 39          | 42                          | 42                            |                             | 98                  |
| Aedes-AAEL010725-PA           | 33          | 34                          | 34                            | 98                          |                     |

283 **Supplementary Figure 2:** Amino acid sequence identity matrix of furin and furin-like proteases between  
 284 human and *Aedes aegypti*.

285

286           Using directed-evolution, we tested the fitness of thousands of DENV2 prM cleavage site variants,  
287 revealing high sequence plasticity. Predicted cleavage efficiency varied greatly between Vero- and C6/36-  
288 selected variants, further indicating differences in substrate preference of mammalian and insect furin  
289 which warrant further investigation. We observed many more viable variants in C6/36 cells compared to  
290 Vero cells, which may indicate a higher tolerance of mutation in furin sites in insect cells which could drive  
291 viral diversity and emergence in nature. However, we cannot rule out that the greater number of viable  
292 variants is an artifact of greater efficiency of the DENV reverse genetics system in C6/36 cells. Both of the  
293 top Vero- and C6/36-selected variants displayed enhanced growth kinetics and a slight increase in peak  
294 titer in Vero cells, indicating tissue culture adaption of the prM cleavage site; this advantage may not be  
295 reflected in natural infections or *in vivo*. Alignment of DENV prM sequences indicates that the furin  
296 cleavage site is extremely conserved in nature, despite high experimental plasticity. This discrepancy  
297 suggests either an unknown advantage of the WT cleavage site or a bottleneck effect in nature.  
298 Nevertheless, both variants from our directed evolution experiment are more mature than DV2-WT,  
299 suggesting selection for mature DENV2 *in vitro* in both mammalian and insect cells. Future experiments  
300 could focus on *in vivo* evolution of the genetic pool, using *Aedes aegypti* mosquitoes.

301           Based on a small cohort of monoclonal Abs and anti-DENV serum, our genetically modified mature  
302 DENVs show similar neutralization profiles to wildtype against antibodies targeting maturation  
303 independent epitopes (such as EDE1, EDE2 and BC loop epitopes), suggesting mutations at the prM  
304 cleavage site do not affect the overall viral protein structure. However, maturation dependent epitopes  
305 present only in one form of the virus, such as the fusion loop<sup>17</sup>, show a different neutralization profile  
306 against our mature DENVs. DENV2 has been shown to be very flexible, and “breathing” could account for  
307 the insensitivity of 1M7 neutralization to maturation status<sup>38,39</sup>. Our results support earlier studies  
308 showing differences in antigenicity between mature and immature DENVs using furin overexpression  
309 cells<sup>18</sup>, while providing new opportunities for studying the role of maturation in antigenicity, vaccine  
310 design, and *in vivo* replication and pathogenesis. Recent studies have demonstrated a potential  
311 disconnect between neutralizing antibody correlates of protective immunity in vaccine recipients<sup>40</sup>. Our  
312 data are consistent with earlier studies showing that the maturation status of DENV particles could have  
313 major implications for neutralization assay outcomes and result in bias during the determination of  
314 “correlates of protection” for vaccine studies<sup>17,20,41</sup>. These findings reinforce the importance of monitoring  
315 DENV maturation status in vaccine development, and our engineered strains provide a universal way to  
316 control DENV maturation for live-attenuated vaccine candidates independent of cell and host.

317 Like many studies, our report generated additional questions. Biologically, does DENV maturation  
318 play a more critical role than simply preventing premature fusion during production? Could maturation  
319 also play a role in vector-to-host or host-to-vector transmission? Is fully mature DENV advantageous or  
320 deleterious in mosquitoes and mammals? What determinants outside of the primary cleavage site  
321 sequence regulate maturation efficiency? Will biologically stabilized virions drive selection of unique  
322 subsets of neutralizing antibodies after infection? Clinically, the antigenic differences between mature  
323 and immature DENV require more comprehensive investigation. Furthermore, a new class of vaccines  
324 could be imagined based on stabilized mature particles which elicit maturation discriminatory antibodies.  
325 Given the clinical relevance and enigmatic nature of DENV maturation, our study adds to understanding  
326 of DENV maturation control and provides essential tools for future investigations.

327

## 328 **Materials and Methods**

### 329 Cells, plasmids and viruses

330 Mosquito (*Aedes albopictus*) C6/36 cells (ATCC# CRL-1660) were maintained in minimum essential  
331 medium (MEM) (Gibco) media supplemented with 5% fetal bovine serum (FBS) (HyClone), 100 U/mL  
332 penicillin and 100 mg/mL penicillin/streptomycin (P/S) (Gibco), 0.1 mM nonessential amino acids (NEAA)  
333 (Gibco), HEPES (Gibco) and 2 mM glutaMAX (Gibco) and incubated in the presence of 5% CO<sub>2</sub> at 32°C. Vero  
334 (ATCC# CCL-81), VF-Hi and VF-Lo (generated from this study) were maintained in Dulbecco's Modified  
335 Eagle's Medium (DMEM) (Gibco) supplemented with 10% FBS, P/S, NEAA and HEPES and incubate in 5%  
336 CO<sub>2</sub> at 37°C. DENV variants were generated by site-directed mutagenesis using Q5 High-fidelity DNA  
337 polymerase (NEB) followed by DENV reverse genetics (see below). The Env and prM of all DENV variants  
338 were sequence confirmed. DV1, 2, 3 and 4-WT viruses are grow in C6/36 or Vero cells maintained in  
339 infection media. C6/36 infection media contains Opti-MEM (Gibco) supplemented with 2% FBS, 1% P/S,  
340 0.1 mM NEAA, 1% HEPES and 2 mM glutaMAX. Vero infection media is the same as the growth media  
341 except with 2% FBS supplement.

### 342 DENV reverse genetics

343 Recombinant viruses were constructed using a four-plasmid cloning strategy as described previously<sup>42</sup>.  
344 The DENV genome was divided into four fragments (A–D fragment) and subcloned into four separate  
345 plasmids. A T7 promoter was introduced into the 5' end of the A fragment, and unique type IIS restriction  
346 endonuclease cleavage sites are introduced into the 5' and 3' ends of each fragment to allow for  
347 systematic assembly into a full-length cDNA from which the full-length RNA transcripts can be derived.  
348 Plasmid DNA was grown in Top10 chemical component cells (ThermoFisher), digested with the

349 corresponding enzymes, gel purified, and ligated together with T4 DNA ligase (NEB). Ligation products  
350 were purified by chloroform extraction. The purified ligation product was used as a template for *in-vitro*  
351 transcription to generate infectious genome-length capped viral RNA transcripts using T7 RNA polymerase  
352 (ThermoFisher). RNA was electroporated into either C6/36 or Vero cells. Cell culture supernatant  
353 containing virus was harvested 4 – 5 days post-electroporation as passage zero. During the subsequent  
354 passages following infection, the cells were grown in infection media.

#### 355 Stable cell line generation, VF-Hi and VF-Lo

356 Human furin was cloned in the sleeping beauty transposon plasmid<sup>26</sup> pSB-bi-RP (Addgene #60513),  
357 transfected along with transposase, pCMV(CAT)T7-SB100 (Addgene #34879) into Vero cell using PEI Max  
358 (MW 40,000) (Polysciences) and selected with 2.5 µg/ml Puromycin (Gibco). Clonal cell lines were  
359 generated through limited dilution of the polyclonal cell line on a 96-well plate at the concentration of 0.3  
360 cell/well.

#### 361 DENV growth kinetic and quantification

362 500,000 Vero or C6/36 cells were seeded in each well of a 6-well plate 1 day prior infection. Cells were  
363 infected with DENV at 0.05 to 0.1 M.O.I. assuming  $1 \times 10^6$  cells on the day of infection. Cells were washed  
364 3 times with PBS and replenished with 3 mL of infection media after 1 hour of inoculation at 37°C in 5%  
365 CO<sub>2</sub> incubator. 300 µl of viral supernatant was collected and fresh media was replenished at 0, 24, 48, 72,  
366 96 and 120 hpi and stored at -80°C. Titer of the viral supernatant was determined using a standard DENV  
367 foci forming assay. In brief, Vero cells were seeded at  $2 \times 10^4$  cells/well in a 96-well plate. 50 µl of serial  
368 diluted viral supernatant were added to each well and incubated for 1h at 37°C in 5% CO<sub>2</sub> incubator. 125  
369 µl of overlay (Opti-MEM + 5% methyl cellulose + NEAA + P/S) was added to each well and incubated for  
370 48h at 37°C + 5% CO<sub>2</sub>. Each well was rinsed 3 times with PBS and fixed with 10% formalin in PBS for  
371 staining. Vero cells were blocked in permeabilization buffer (eBioscience) with 5% non-fat dried milk. Two  
372 primary antibodies, anti-prM mAb 2H2 and anti-Env mAb 4G2, from non-purified hybridoma supernatant  
373 were used at 1:500 dilution in blocking buffer. Goat anti-mouse secondary conjugated with horseradish  
374 peroxidase (HRP) (SeraCare's KPL) were diluted at 1:1000 in blocking buffer. Foci were developed using  
375 TrueBlue HRP substrate (SeraCare's KPL) and counted using an automated Immunospot Analyzer  
376 instrument (Cellular Technology Limited). All experiments were performed independently a minimum of  
377 3 times.

#### 378 Immunostaining and western blotting for human furin

379 Cells were fixed in 10% formalin in PBS and permeabilized with permeabilization buffer (eBioscience).  
380 Rabbit anti-furin (Thermo, PA1-062, 1:1000) was used as primary antibody. Goat anti-rabbit Alexa488

381 (Invitrogen, 1:2000) as secondary antibody. For western blotting, cell were lysed in 1% TritonX100, 100  
382 mM Tris, 2M NaCl and 100 mM EDTA. Cell lysates were run in SDS-PAGE and blotted onto PVDF  
383 membrane. Furin bands were detected using rabbit anti-furin polyclonal at 1:1000 and Goat anti-rabbit  
384 HRP (Invitrogen, 1:5000) was used as secondary antibody.

#### 385 Western Blotting for DENV maturation

386 Viral stocks or supernatant from DENV growth curves at 120hpi were diluted with 4x Laemmli Sample  
387 Buffer (Bio-Rad) and boiled at 95°C for 5 minutes. Following SDS-PAGE electrophoresis, proteins were  
388 transferred to PVDF membrane and blocked in blocking buffer consist of 3% non-fat milk in PBS + 0.05%  
389 Tween-20 (PBS-T). The membrane was incubated with polyclonal rabbit anti-prM (1:1000, Invitrogen, Cat.  
390 #PA5-34966) and purified human anti-Env (fusion loop) 1M7 (2µg/ml) in 2% BSA + PBS-T solution for 1h  
391 at 37°C. The primary antigen-antibody complex was detected by incubating the blot with goat anti-rabbit  
392 IgG HRP (1:10000, Jackson-ImmunoLab) and sheep anti-human IgG HRP (1:5000, GE Healthcare) in 3%  
393 milk in PBS-T, for 1h at room temperature. Membranes were developed by Supersignal West Pico PLUS  
394 Chemiluminescent Substrate (ThermoFisher). Western blot images were captured with iBright FL1500  
395 imaging system (Invitrogen). The pixel intensity of individual bands was measured using ImageJ, and  
396 relative maturation was calculated by using the following equation:  $(prM_{Exp}/Env_{Exp})/(prM_{WT}/Env_{WT})$ . All  
397 experiments were performed independently a minimum of 3 times.

#### 398 Foci reduction neutralization titer assay (FRNT Assay)

399 FRNT assays were performed on Vero cells as has been described previously<sup>43</sup>. Briefly,  $2 \times 10^4$  Vero cells  
400 were seeded in a 96-well plate. Antiserum or mAbs were serially diluted and mixed with DENV viruses (80  
401 – 100 FFU/well) at a 1:1 volume ratio and incubated at 37°C for 1h without the cells. The mixture was  
402 transferred to the 96-well plate with Vero cells and incubated at 37°C for 1h. The plate is subsequently  
403 overlaid with overlay medium (see above). Viral foci were stained and counted as described above. Data  
404 were fitted with variable slope sigmoidal dose-response curves and FRNT<sub>50</sub> were calculated with top or  
405 bottom restraints of 100 and 0, respectively. All experiments were performed independently at least 2  
406 times, due to limited amounts of human serum.

#### 407 DENV2 library generation and directed-evolution

408 DENV prM libraries were engineered through saturation mutagenesis on amino acid residues P3, 5, 6 and  
409 7 of the DENV furin cleavage site based on previously published protocol<sup>44</sup>. In brief, degenerate NNK oligos  
410 (Integrated DNA Technologies) were used to amplify the prM region to generate a library with mutated  
411 prM DNA fragments. To limit bias and ensure accuracy, Q5 high fidelity polymerase (NEB) was used and  
412 limited to <18 cycles of amplification. The DNA library was cloned into the DENV reverse genetics system

413 plasmid A to create a plasmid library by standard restriction digestion. Ligation reactions were then  
414 concentrated and purified by ethanol precipitation. Purified ligation products were electroporated into  
415 DH10B ElectroMax cells (Invitrogen) and directly plated on multiple 5,245-mm<sup>2</sup> bioassay dishes (Corning)  
416 to avoid bias from bacterial suspension cultures. Colonies were pooled and purified using a Maxiprep Kit  
417 (Qiagen). The plasmid library was used for DENV reverse genetics as described above. The *in vitro*  
418 transcribed DENV RNA library was electroporated in either Vero or C6/36 cells, the viral supernatants  
419 were passaged 3 times every 4 to 5 days in the corresponding cells for enrichment.

#### 420 High-throughput sequencing and analysis

421 Viral RNA was isolated using a QIAamp Viral RNA Mini Kit (Qiagen). Amplicons containing the library  
422 regions were prepared for sequencing through two rounds of PCR, using the Illumina TruSeq system and  
423 Q5 Hot Start DNA polymerase (NEB). Primers for the first round of PCR were specific to the DENV2 prM  
424 sequence with overhangs for Illumina adapters. This PCR product was purified and used as a template for  
425 a second round of PCR using the standard Illumina P5 and P7 primers with barcodes and sequencing  
426 adaptors. PCR products were purified and analyzed on a Qubit 4 fluorometer (Invitrogen) and Bioanalyzer  
427 (Agilent Technologies) for quality control. Amplicon libraries were diluted to 4 nM and pooled for  
428 sequencing, which was carried out on a MiSeq system with 300bp paired-end reads. Plasmid and P0  
429 libraries were sequenced at a depth of ~1 million reads per sample; further passages were sequenced  
430 with depth between 300,000 – 1 million reads to sample. A custom perl script<sup>44</sup> was used to analyze the  
431 sequences, and custom R scripts were used to plot the data.

#### 432 Furin cleavage prediction

433 Furin cleavage site efficiency was predicted using the Pi-Tou software<sup>25</sup>, providing amino acids from  
434 position P14-P6' of the DENV furin cleavage sites.

#### 435 Statistical analysis

436 Statistical analysis was carried out using Graphpad Prism version 9.0. Growth kinetics and maturation of  
437 DENV variants were compared to their corresponding wildtype using 2-way ANOVA multiple comparisons.  
438 Neutralization titers of DENV variants were compared to their corresponding wildtype using Student's t-  
439 test. Significance symbols are defined as follow: \* p<0.05, \*\* p< 0.01, \*\*\* p<0.001, \*\*\*\* p<0.0001. Data  
440 are graphed as mean +/- standard deviation.

441

#### 442 Acknowledgments

443 We thank members of the Baric and de Silva laboratories for helpful discussions. This project received  
444 support from NIH grants AI107731 and AI125198 to A.M.D and R.S.B. P01 AI106695 to A.M.D.. L.V.T. is  
445 the recipient of the Pfizer NCBIotech Distinguished Postdoctoral Fellowship in Gene Therapy.

446

#### 447 Author Contributions

448 L.V.T and R.S.B designed the study. R.M.M perform high-throughput sequencing preparation and analysis.  
449 L.V.T., R.M.M., S.D., L.E.A., L.J.W. performed experiments. L.V.T., A.M.D., R.S.B. provide oversight of the  
450 project. L.V.T. wrote the manuscript. R.M.M and R.S.B. reviewed and revised the final version.

451

#### 452 Conflict of Interest

453 L.V.T. R.M.M. and R.S.B. are inventors on a patent application filed on the subject matter of this  
454 manuscript.

455

#### 456 References

- 457 1. Brady, O. J. *et al.* Refining the Global Spatial Limits of Dengue Virus Transmission by Evidence-  
458 Based Consensus. *PLoS Negl. Trop. Dis.* **6**, (2012).
- 459 2. Bhatt, S. *et al.* The global distribution and burden of dengue. *Nature* **496**, 504–507 (2013).
- 460 3. Messina, J. P. *et al.* The current and future global distribution and population at risk of dengue.  
461 *Nat. Microbiol.* **4**, 1508–1515 (2019).
- 462 4. Wilder-Smith, A. *et al.* Deliberations of the Strategic Advisory Group of Experts on Immunization  
463 on the use of CYD-TDV dengue vaccine. *Lancet Infect. Dis.* **19**, e31–e38 (2019).
- 464 5. Report, W. H. O. Dengue vaccine: WHO position paper, September 2018 – Recommendations.  
465 *Vaccine* **37**, 4848–4849 (2019).
- 466 6. White, J. M., Delos, S. E., Brecher, M. & Schornberg, K. Structures and mechanisms of viral  
467 membrane fusion proteins: Multiple variations on a common theme. *Crit. Rev. Biochem. Mol.*  
468 *Biol.* **43**, 189–219 (2008).
- 469 7. Harrison, S. C. Viral membrane fusion. *Virology* **479–480**, 498–507 (2015).
- 470 8. Kuhn, R. J. *et al.* Structure of dengue virus: implications for flavivirus organization, maturation,  
471 and fusion. *Cell* **108**, 717–25 (2002).
- 472 9. Zybert, I. A., van der Ende-Metselaar, H., Wilschut, J. & Smit, J. M. Functional importance of  
473 dengue virus maturation: Infectious properties of immature virions. *J. Gen. Virol.* **89**, 3047–3051  
474 (2008).



- 475 10. Plevka, P., Battisti, A. J., Sheng, J. & Rossmann, M. G. Mechanism for maturation-related  
476 reorganization of flavivirus glycoproteins. *J. Struct. Biol.* **185**, 27–31 (2014).
- 477 11. Kostyuchenko, V. A., Zhang, Q., Tan, J. L., Ng, T.-S. & Lok, S.-M. Immature and Mature Dengue  
478 Serotype 1 Virus Structures Provide Insight into the Maturation Process. *J. Virol.* **87**, 7700–7707  
479 (2013).
- 480 12. Zhang, Y. *et al.* Conformational changes of the flavivirus E glycoprotein. *Structure* **12**, 1607–1618  
481 (2004).
- 482 13. Mackenzie, J. M. & Westaway, E. G. Assembly and Maturation of the Flavivirus Kunjin Virus  
483 Appear To Occur in the Rough Endoplasmic Reticulum and along the Secretory Pathway,  
484 Respectively. *J. Virol.* **75**, 10787–10799 (2001).
- 485 14. Li, L. *et al.* The flavivirus precursor membrane-envelope protein complex: structure and  
486 maturation. *Science* **319**, 1830–1834 (2008).
- 487 15. Yu, I. *et al.* Structure of the Immature Dengue Virus at Low pH Primes Proteolytic Maturation. **13**,  
488 1834–1838 (2008).
- 489 16. Wirawan, M. *et al.* Mechanism of Enhanced Immature Dengue Virus Attachment to Endosomal  
490 Membrane Induced by prM Antibody. *Structure* **27**, 253-267.e8 (2019).
- 491 17. Raut, R. *et al.* Dengue type 1 viruses circulating in humans are highly infectious and poorly  
492 neutralized by human antibodies. *Proc. Natl. Acad. Sci.* **116**, 227–232 (2019).
- 493 18. Dowd, K. A., Mukherjee, S., Kuhn, R. J. & Pierson, T. C. Combined Effects of the Structural  
494 Heterogeneity and Dynamics of Flaviviruses on Antibody Recognition. *J. Virol.* **88**, 11726–11737  
495 (2014).
- 496 19. Galula, J. U., Salem, G. M., Chang, G. J. J. & Chao, D. Y. Does structurally-mature dengue virion  
497 matter in vaccine preparation in post-Dengvaxia era? *Hum. Vaccines Immunother.* **15**, 2328–2336  
498 (2019).
- 499 20. Pierson, T. C. & Diamond, M. S. Degrees of maturity: The complex structure and biology of  
500 flaviviruses. *Curr. Opin. Virol.* **2**, 168–175 (2012).
- 501 21. Rodenhuis-Zybert, I. A. *et al.* Immature dengue virus: A veiled pathogen? *PLoS Pathog.* **6**, (2010).
- 502 22. Katzelnick, L. C. *et al.* Immune correlates of protection for dengue: State of the art and research  
503 Agenda. *Vaccine* **35**, 4659–4669 (2017).
- 504 23. Mukherjee, S. *et al.* Enhancing dengue virus maturation using a stable furin over-expressing cell  
505 line. *Virology* **497**, 33–40 (2016).
- 506 24. Gallichotte, E. N. *et al.* Genetic Variation between Dengue Virus Type 4 Strains Impacts Human

- 507 Antibody Binding and Neutralization. *Cell Rep.* **25**, 1214–1224 (2018).
- 508 25. Tian, S., Huajun, W. & Wu, J. Computational prediction of furin cleavage sites by a hybrid method  
509 and understanding mechanism underlying diseases. *Sci. Rep.* **2**, (2012).
- 510 26. Kowarz, E., Löscher, D. & Marschalek, R. Optimized Sleeping Beauty transposons rapidly generate  
511 stable transgenic cell lines. *Biotechnol. J.* 647–653 (2015). doi:10.1002/biot.201400821
- 512 27. Dejnirattisai, W. *et al.* A new class of highly potent, broadly neutralizing antibodies isolated from  
513 viremic patients infected with dengue virus. *Nat. Immunol.* **16**, 170–177 (2015).
- 514 28. Smith, S. A. *et al.* The potent and broadly neutralizing human dengue virus-specific monoclonal  
515 antibody 1C19 reveals a unique cross-reactive epitope on the bc loop of domain II of the  
516 envelope protein. *MBio* **4**, 1–12 (2013).
- 517 29. Matthews, D. J., Goodman, L. J., Gorman, C. M. & Wells, J. A. A survey of furin substrate  
518 specificity using substrate phage display. *Protein Sci.* **3**, 1197–1205 (1994).
- 519 30. Izidoro, M. A. *et al.* A study of human furin specificity using synthetic peptides derived from  
520 natural substrates, and effects of potassium ions. *Arch. Biochem. Biophys.* **487**, 105–114 (2009).
- 521 31. Shiryayev, S. A. *et al.* High-Resolution Analysis and Functional Mapping of Cleavage Sites and  
522 Substrate Proteins of Furin in the Human Proteome. *PLoS One* **8**, 1–12 (2013).
- 523 32. Duckert, P., Brunak, S. & Blom, N. Prediction of proprotein convertase cleavage sites. *Protein Eng.*  
524 *Des. Sel.* **17**, 107–112 (2004).
- 525 33. Cano-Monreal, G. L., Williams, J. C. & Heidner, H. W. An arthropod enzyme, Dfurin1, and a  
526 vertebrate furin homolog display distinct cleavage site sequence preferences for a shared viral  
527 proprotein substrate. *J. Insect Sci.* **10**, 1–16 (2010).
- 528 34. Snapp, E. L. *et al.* Structure and topology around the cleavage site regulate post-translational  
529 cleavage of the HIV-1 gp160 signal peptide. *Elife* **6**, 1–25 (2017).
- 530 35. Tse, L. V., Hamilton, A. M., Friling, T. & Whittaker, G. R. A Novel Activation Mechanism of Avian  
531 Influenza Virus H9N2 by Furin. *J. Virol.* **88**, 1673–1683 (2014).
- 532 36. Zhang, Q. *et al.* The stem region of premembrane protein plays an important role in the virus  
533 surface protein rearrangement during dengue maturation. *J. Biol. Chem.* **287**, 40525–40534  
534 (2012).
- 535 37. Shen, W.-F. *et al.* Epitope resurfacing on dengue virus-like particle vaccine preparation to induce  
536 broad neutralizing antibody. *Elife* **7**, 1–24 (2018).
- 537 38. Fibriansah, G. *et al.* Structural Changes in Dengue Virus When Exposed to a Temperature of 37 C.  
538 *J. Virol.* **87**, 7585–7592 (2013).

- 539 39. Kuhn, R. J., Dowd, K. A. & Post, C. B. Shake, rattle, and roll: Impact of the dynamics of flavivirus  
540 particles on their interactions with the host. *Viol. J.* 508–517 (2016).  
541 doi:10.1016/j.virol.2015.03.025.Shake
- 542 40. Villar, L. *et al.* Efficacy of a Tetravalent Dengue Vaccine in Children in Latin America. *N. Engl. J.*  
543 *Med.* **372**, 113–123 (2015).
- 544 41. de Silva, A. M. & Harris, E. Which dengue vaccine approach is the most promising, and should we  
545 be concerned about enhanced disease after vaccination?: Questions raised by the development  
546 and implementation of dengue vaccines: Example of the sanofi pasteur tetravalent dengue  
547 vaccine. *Cold Spring Harb. Perspect. Biol.* **10**, 1–11 (2018).
- 548 42. Messer, W. B. *et al.* Development and characterization of a reverse genetic system for studying  
549 dengue virus serotype 3 strain variation and neutralization. *PLoS Negl. Trop. Dis.* **6**, (2012).
- 550 43. Young, E. *et al.* Identification of Dengue Virus Serotype 3 Specific Antigenic Sites Targeted by  
551 Neutralizing Human Antibodies. *Cell Host Microbe* **27**, 710-724.e7 (2020).
- 552 44. Tse, L. V. *et al.* Structure-guided evolution of antigenically distinct adeno-associated virus variants  
553 for immune evasion. *Proc. Natl. Acad. Sci.* **114**, E4812–E4821 (2017).  
554
